# Supplementary material for: Development and Evaluation of the Personal Patient Profile-Prostate (P3P), a Web-Based Decision Support System for Men Newly Diagnosed With Localized Prostate Cancer
Source: PubMed Central journal article supplement (PMC3056527; doi:10.2196/jmir.1576), 2010-12-17
Supplement: jmir_v12i4e67_app3.pdf [file jmir_v12i4e67_app3.pdf]

**Multimedia Appendix 3. Decisional control video: Active participation**

Personal Patient Profile - Prostate



**Decisional Control**

Paused 00:00

When you are ready to move on, touch the Next button.

Next
