# Supplementary material for: Development and Evaluation of the Personal Patient Profile-Prostate (P3P), a Web-Based Decision Support System for Men Newly Diagnosed With Localized Prostate Cancer
Source: PubMed Central journal article supplement (PMC3056527; doi:10.2196/jmir.1576), 2010-12-17

**Multimedia Appendix 6. Influential outcome video: Bladder**

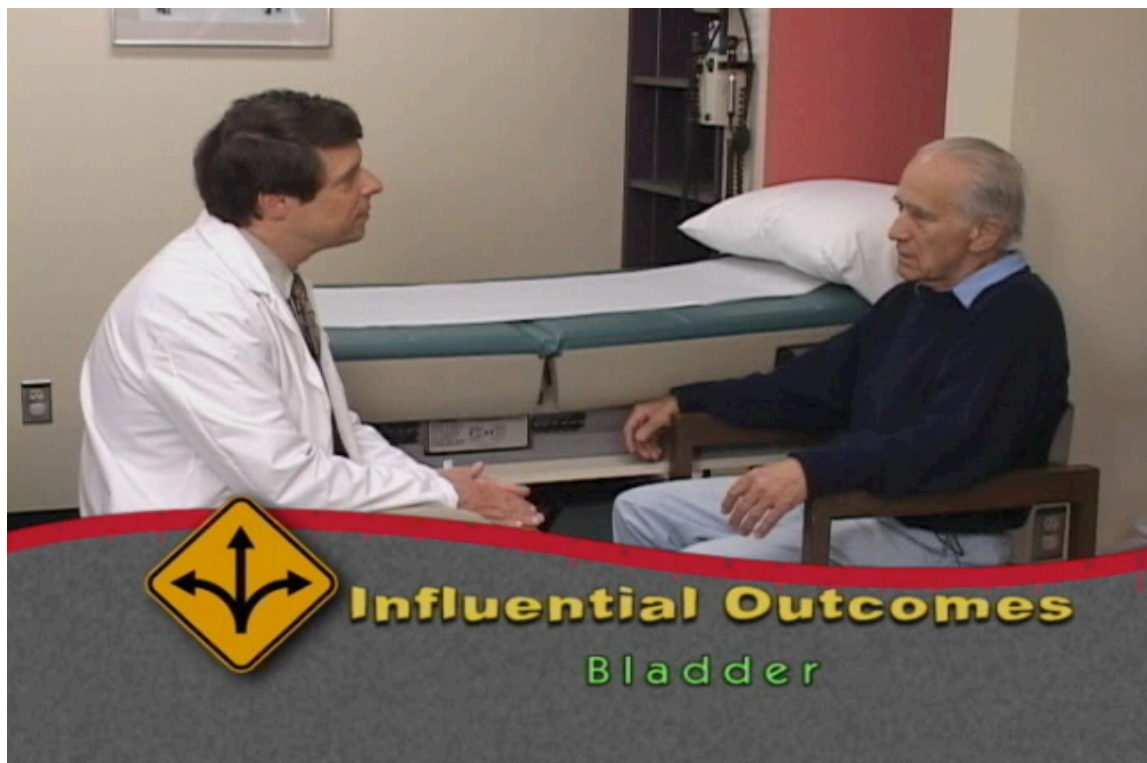

Supplement: jmir_v12i4e67_app6.pdf [file jmir_v12i4e67_app6.pdf]
