# Supplementary material for: Development and Evaluation of the Personal Patient Profile-Prostate (P3P), a Web-Based Decision Support System for Men Newly Diagnosed With Localized Prostate Cancer
Source: PubMed Central journal article supplement (PMC3056527; doi:10.2196/jmir.1576), 2010-12-17

**Multimedia Appendix 8.** Screenshot of a current symptom coaching page

 Personal Patient Profile - Prostate 

**Based on your answers earlier, it looks like you are dealing with sexual symptoms or erectile dysfunction right now.**

**We suggest you speak with your doctor about it, something like this:**

**"Well doctor, I want to mention, I have trouble with sexual interest (or activities) \_\_\_\_\_(fill in with when and how). Would any of the treatments affect this?"**

**Touch the "Play Movie" button if you would like to see a video about talking it over with your doctor.**

  
Play Movie

 

Supplement: jmir_v12i4e67_app8.pdf [file jmir_v12i4e67_app8.pdf]
