# Supplementary material for: Development and Evaluation of the Personal Patient Profile-Prostate (P3P), a Web-Based Decision Support System for Men Newly Diagnosed With Localized Prostate Cancer
Source: J Med Internet Res. 2010 Dec 17;12(4):e67. doi: 10.2196/jmir.1576 (PMC3056527; doi:10.2196/jmir.1576)
Supplement: Supplementary file 7 [file jmir_v12i4e67_app5.pdf]

If this early stage of cancer is not treated, about 27 of 100 men (27%) will, over the long term, experience symptoms of advanced prostate cancer and most of these 27 will die of it.

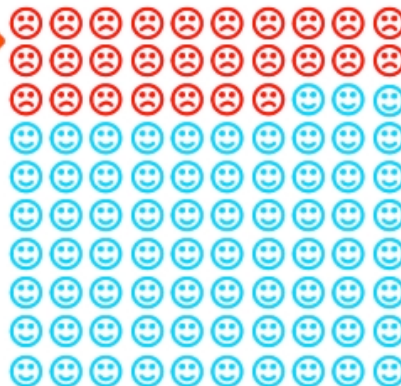

The other 73 of 100 men (73%) would not be severely affected by the cancer and would die of other causes.

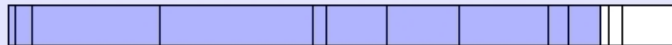

Next
