# Supplementary material for: Development and Evaluation of the Personal Patient Profile-Prostate (P3P), a Web-Based Decision Support System for Men Newly Diagnosed With Localized Prostate Cancer
Source: J Med Internet Res. 2010 Dec 17;12(4):e67. doi: 10.2196/jmir.1576 (PMC3056527; doi:10.2196/jmir.1576)
Supplement: Supplementary file 10 [file jmir_v12i4e67_app7.pdf]

Personal Patient Profile - Prostate

Over the *past 4 weeks*, how often have you leaked urine?

- ☐ More than once a day
- ☐ About once a day
- ☒ More than once a week
- ☐ About once a week
- ☐ Rarely or never
